# Supplementary material for: A hydrogen bonded Co(ii) coordination complex and a triply interpenetrating 3-D manganese(ii) coordination polymer from diaza crown ether with dibenzoate sidearms
Source: Royal Society of Chemistry journal article supplement (doi:10.1039/c6ce00360e), 2016-01-01
Supplement: c6ce00360e1.pdf [file c6ce00360e1.pdf]

## Electronic Supplemental information

### **A Hydrogen bonded Co(II) Coordination Complex and a Triply Interpenetrating 3-D Manganese(II) Coordination Polymer from a Diaza Crown Ether with Dibenzoate Sidearms**

Liang Liao<sup>§,⊥</sup>, Conrad W. Ingram<sup>§,⊥,\*</sup>, John Bacsa<sup>†,‡</sup>, Z. John Zhang<sup>‡</sup>, Tandabany Dinadayalane<sup>⊥</sup>

<sup>§</sup> *Center for Functional Nanoscale Materials, ⊥* *Department of Chemistry, Clark Atlanta University, 223 James P. Brawley Drive, Atlanta, GA 30314,*

<sup>†</sup> *Department of Chemistry, Emory University, Atlanta, GA 30332,*

<sup>‡</sup> *School of Chemistry and Biochemistry, Georgia Institute of Technology, Atlanta, GA 30322*

\*Corresponding author: *Tel.: +1 404-880-6898; E-mail address: [cingram@cau.edu](mailto:cingram@cau.edu)*

Figure S1. Single crystal of LH<sub>2</sub> chloride salt. (Black C, Grey H, Red O, Green Cl)

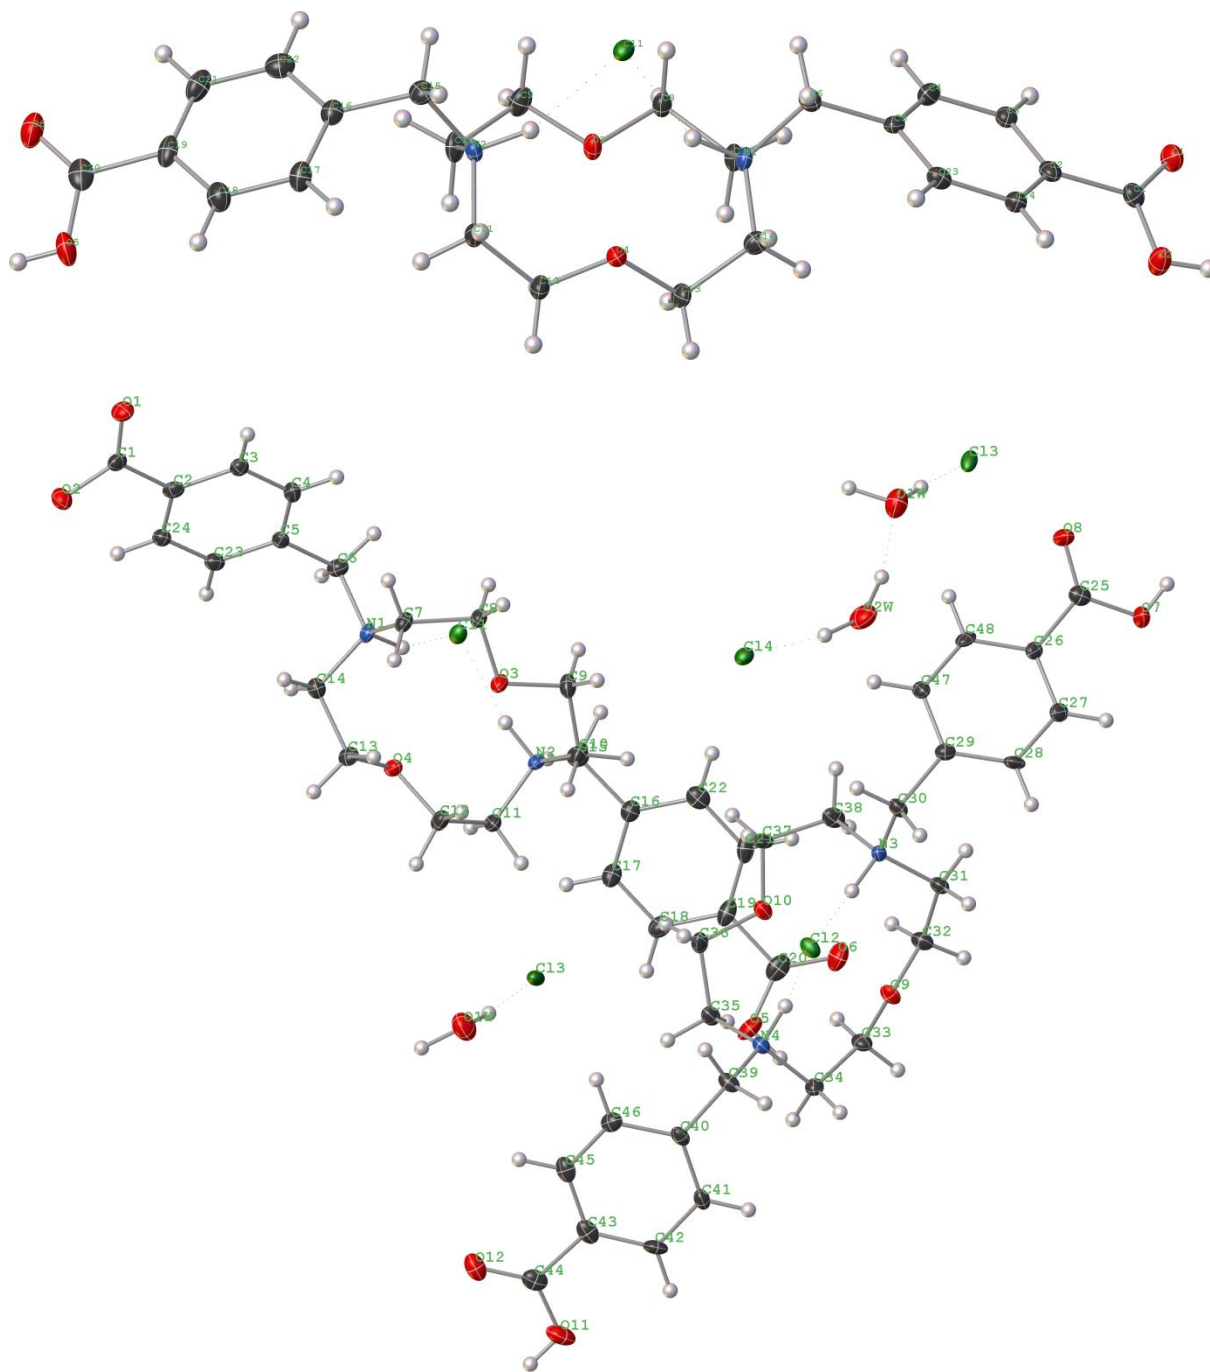

Figure S2a. Powder X-ray and simulated (from single crystal x-ray data) diffraction patterns of **1**.

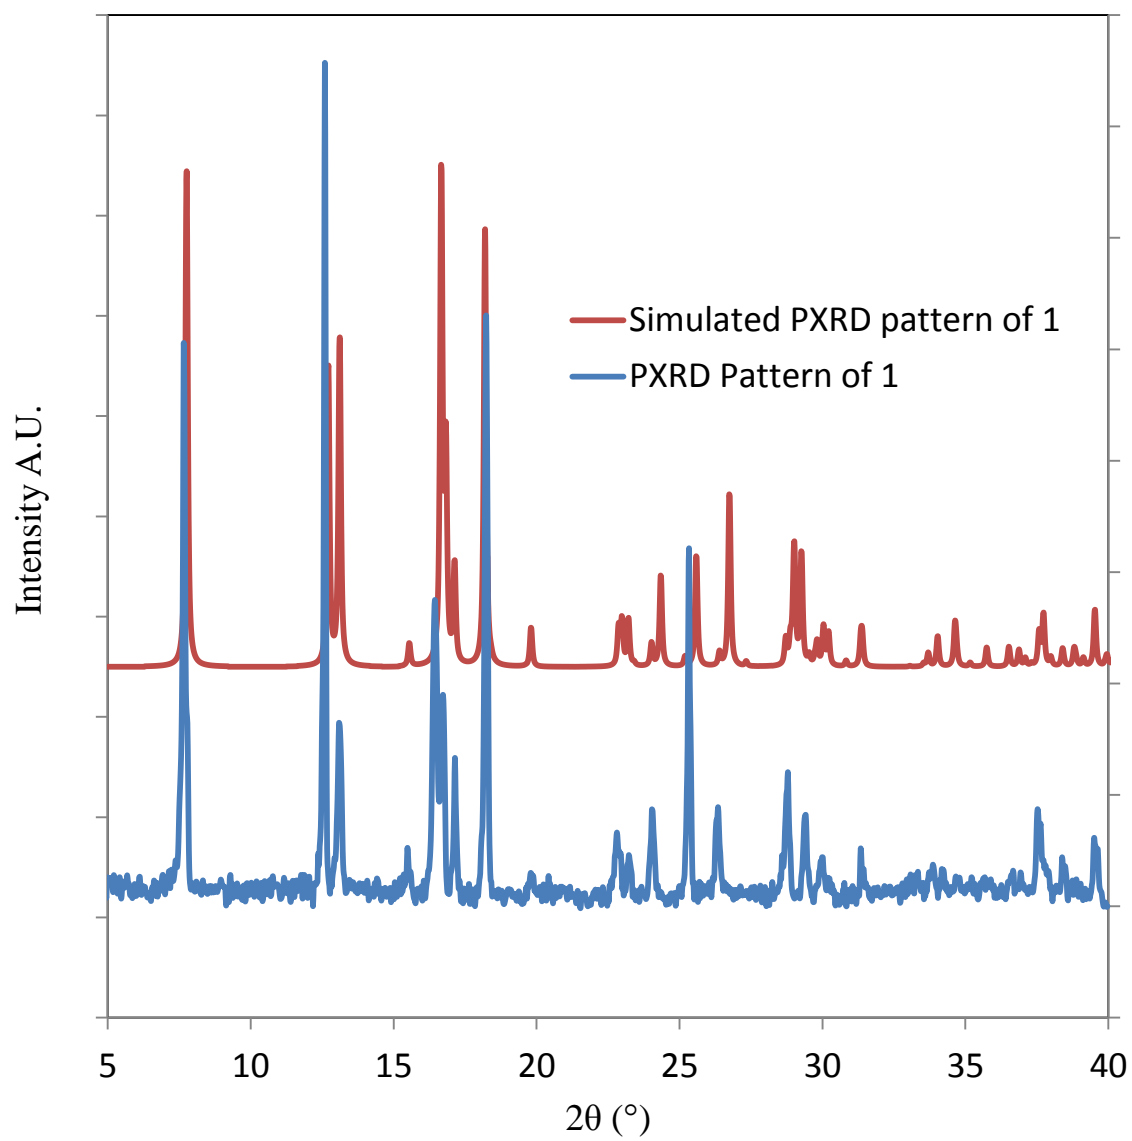

Figure S2b. Powder X-ray and simulated (from single crystal x-ray data) diffraction patterns of **2**.

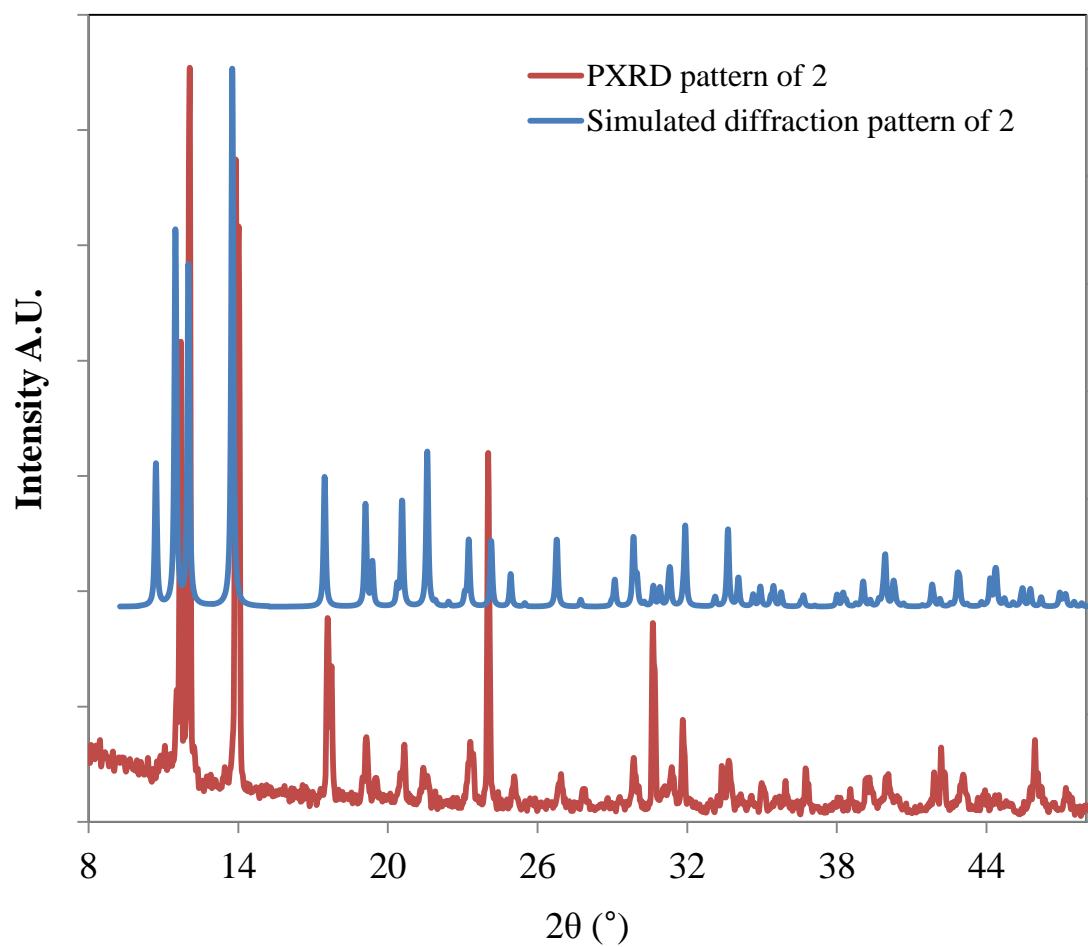

Figure S3: M06-2X/6-311+G(d,p) level optimized conformers of neutral ligand (**LH<sub>2</sub>**) structure.

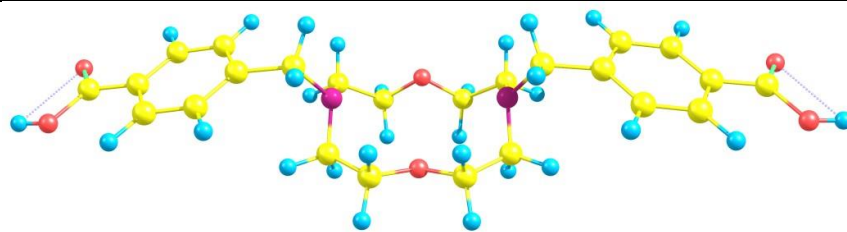

**LH<sub>2</sub>-Comp**

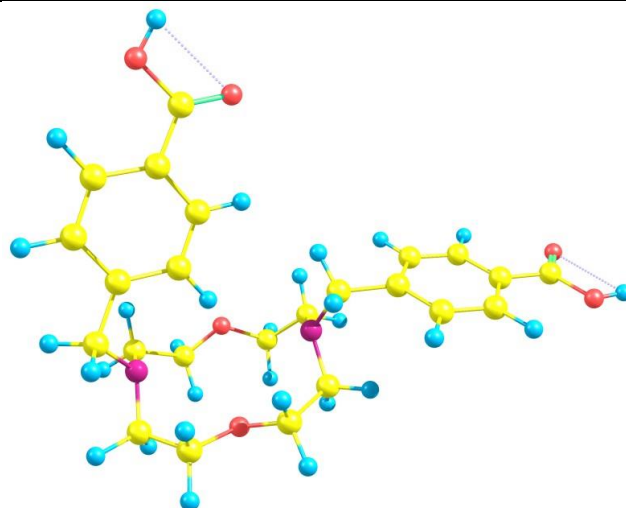

**LH<sub>2</sub>-C1**

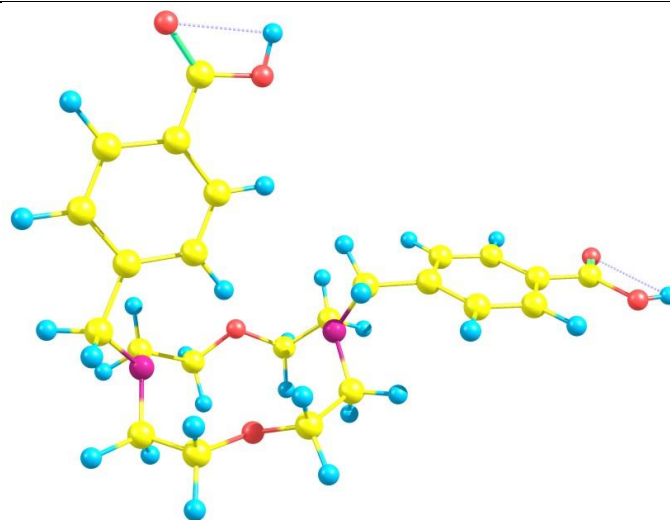

**LH<sub>2</sub>-C2**

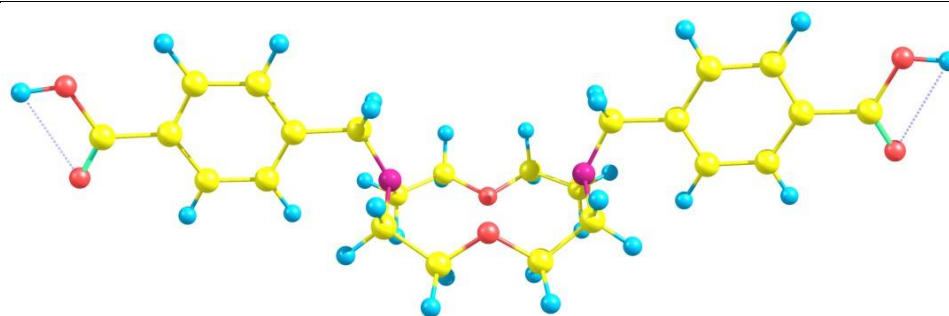

**LH<sub>2</sub>-C3**

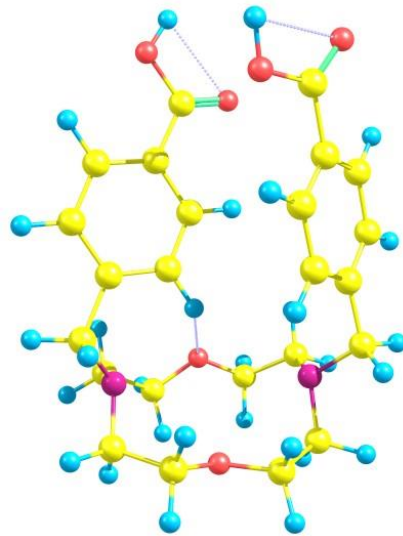

**LH<sub>2</sub>-C4**

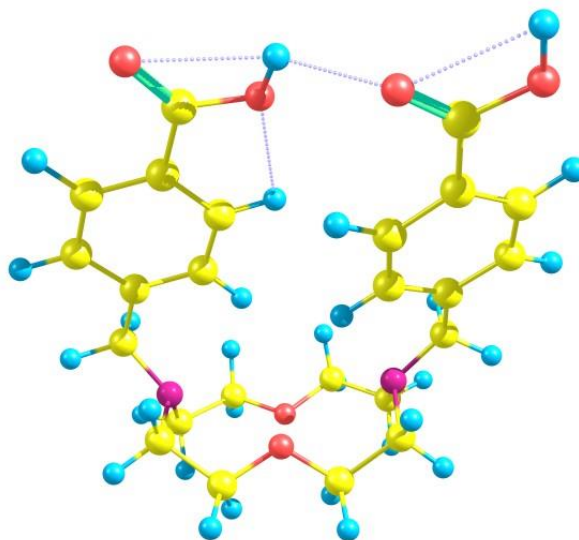

**LH<sub>2</sub>-C5**

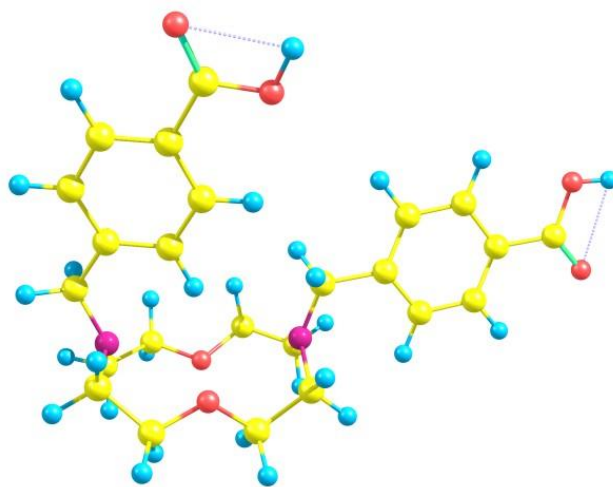

**LH<sub>2</sub>-C6**

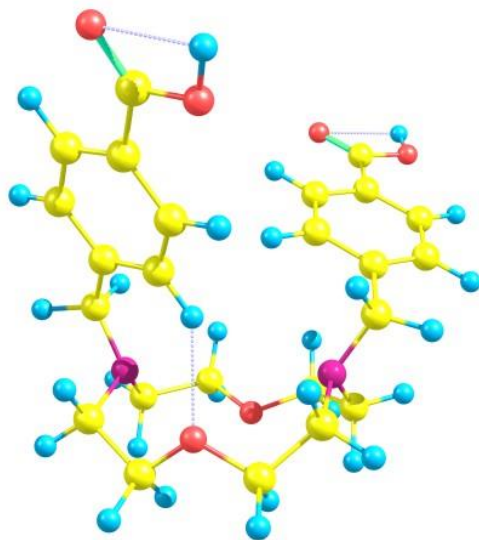

**LH<sub>2</sub>-C7**

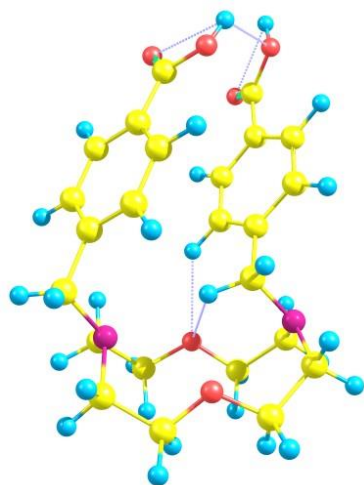

**LH<sub>2</sub>-C8**

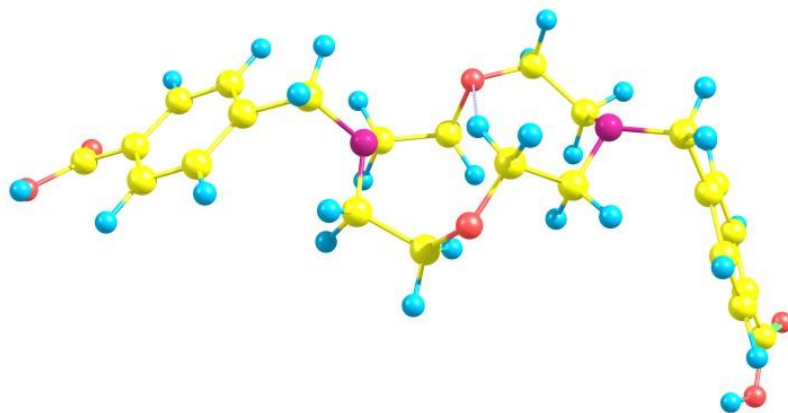

**LH<sub>2</sub>-C9**

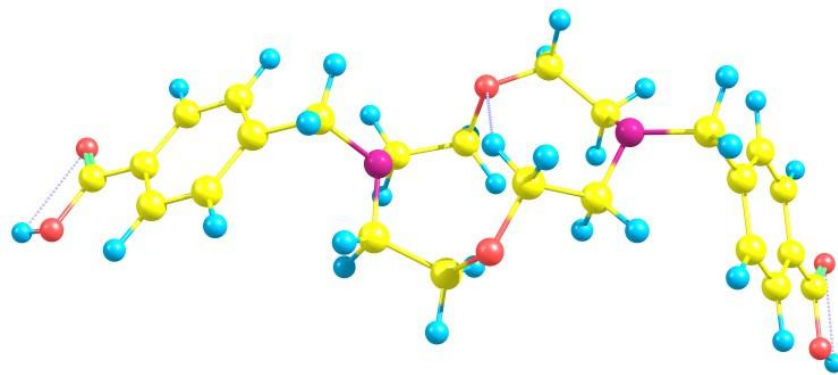

**LH<sub>2</sub>-C10**

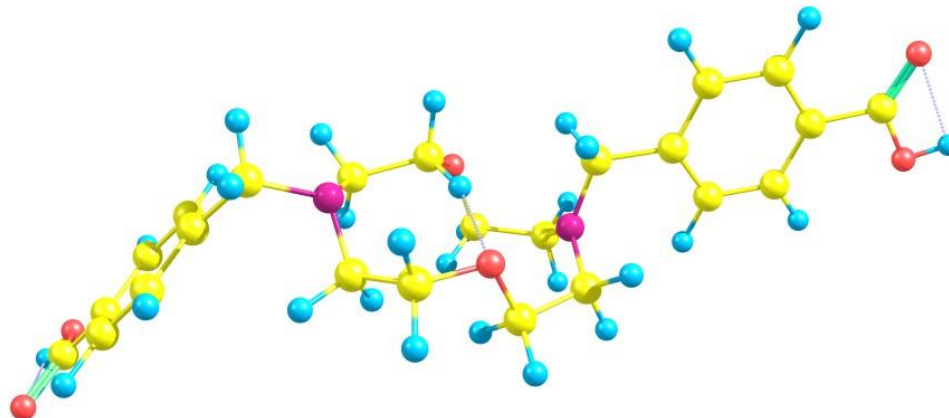

**LH<sub>2</sub>-C11**

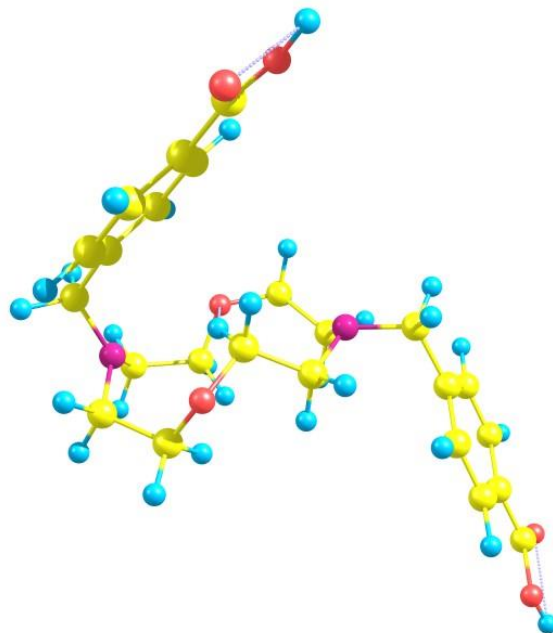

**LH<sub>2</sub>-C12**



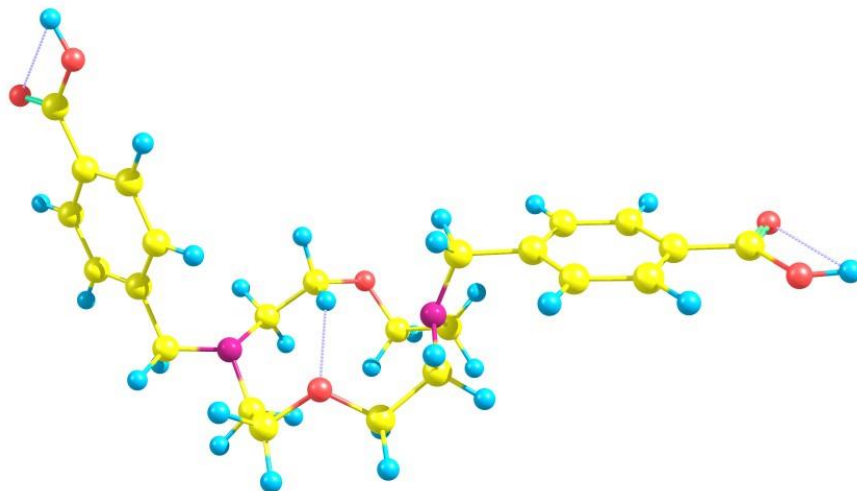

**LH<sub>2</sub>-C13**

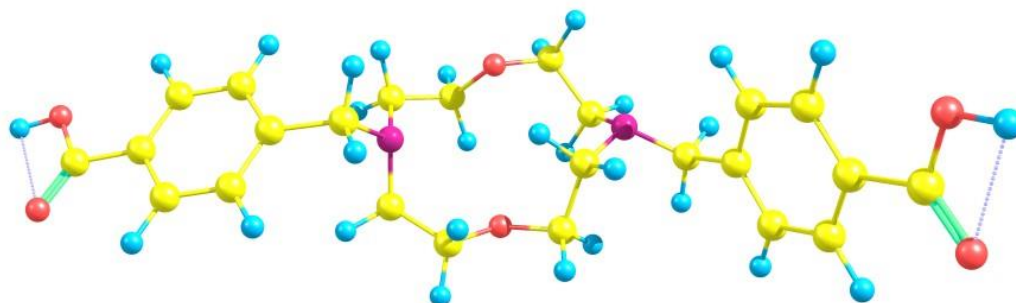

**LH<sub>2</sub>-C14**

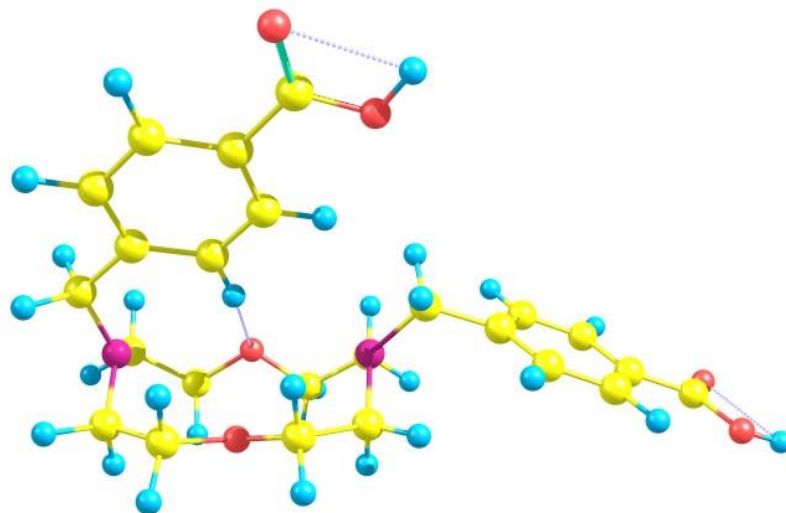

**LH<sub>2</sub>-C15**

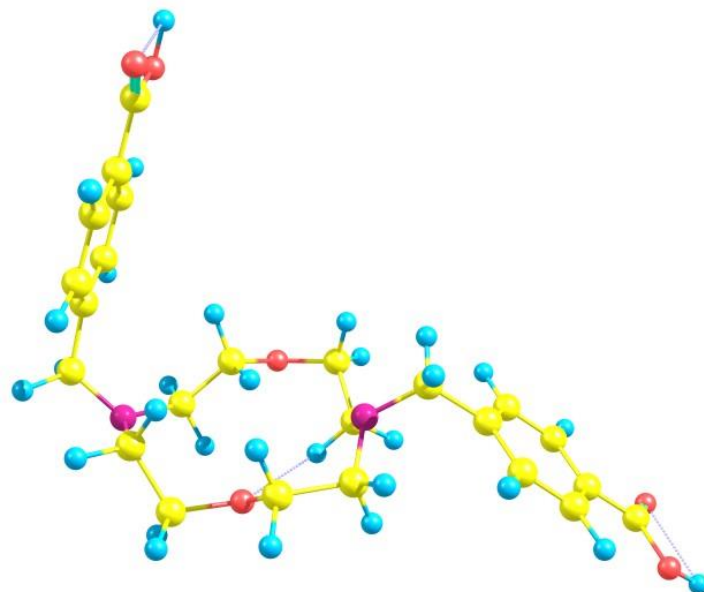

**LH<sub>2</sub>-C16**

Figure S4. Thermogravimetric-analysis curves of **1** and **2**.

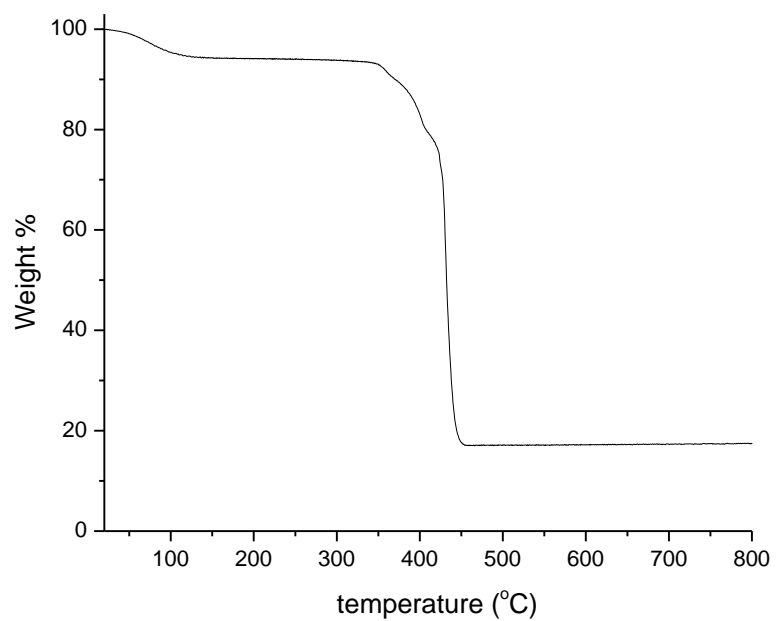

**1**

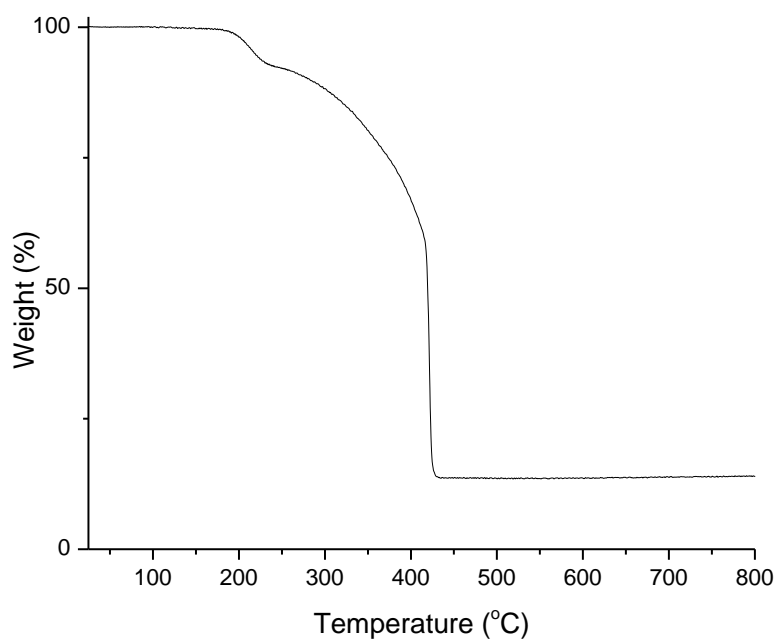

**2**



C4

6216 (6)

535.7 (16)

4859 (7)

19.3 (7)

Table S3. Anisotropic Displacement Parameters ( $\text{\AA}^2 \times 10^3$ ) for **1**. The Anisotropic displacement factor exponent takes the form:  $-2\pi^2[h^2a^{*2}U_{11}+\dots+2hka \times b \times U_{12}]$

| Atom | $U_{11}$  | $U_{22}$  | $U_{33}$  | $U_{23}$   | $U_{13}$  | $U_{12}$   |
|------|-----------|-----------|-----------|------------|-----------|------------|
| Co1  | 15.1 (3)  | 9.6 (3)   | 16.8 (3)  | 0          | 11.2 (2)  | 0          |
| O1   | 16.6 (19) | 11 (2)    | 17.6 (18) | 0          | 10.8 (16) | 0          |
| O6   | 21 (2)    | 8 (2)     | 19.6 (19) | 0          | 10.8 (18) | 0          |
| O2   | 25 (2)    | 10 (2)    | 21.6 (18) | 0          | 18.6 (17) | 0          |
| O5   | 18 (2)    | 12 (2)    | 27 (2)    | 0          | 16.7 (18) | 0          |
| O3   | 26.6 (15) | 14.6 (14) | 21.4 (13) | -5.5 (10)  | 15.0 (12) | -4.0 (11)  |
| C6   | 15 (2)    | 9.3 (15)  | 21.4 (16) | -1.2 (15)  | 10.7 (17) | -1.3 (12)  |
| N1   | 17.4 (14) | 12.4 (16) | 16.0 (13) | 0.7 (11)   | 11.0 (12) | -0.3 (12)  |
| C12  | 14.8 (16) | 13.2 (17) | 20.9 (15) | 1.0 (14)   | 10.1 (13) | 2.0 (14)   |
| C9   | 13.8 (15) | 9.8 (17)  | 18.4 (14) | 1.4 (12)   | 8.9 (13)  | 2.3 (13)   |
| C5   | 17.7 (16) | 11.6 (18) | 21.3 (16) | -0.3 (13)  | 12.9 (14) | -0.9 (14)  |
| C7   | 19.0 (18) | 16 (2)    | 16.0 (15) | -1.0 (14)  | 10.2 (14) | -0.8 (15)  |
| C3   | 22.7 (18) | 14.7 (19) | 22.0 (16) | 3.1 (13)   | 16.1 (15) | -0.4 (14)  |
| C10  | 19.6 (17) | 14.5 (19) | 21.6 (17) | -1.9 (13)  | 14.4 (15) | -2.0 (14)  |
| C11  | 21.0 (19) | 13 (2)    | 25.4 (18) | 1.6 (14)   | 16.9 (16) | -1.2 (15)  |
| C2   | 19.4 (18) | 12.1 (18) | 17.4 (15) | -2.2 (13)  | 11.4 (14) | 0.6 (14)   |
| O4   | 68 (2)    | 19.2 (17) | 69 (2)    | -16.4 (15) | 62 (2)    | -19.8 (16) |
| C1   | 18.5 (17) | 15.3 (19) | 19.9 (15) | -1.8 (13)  | 12.2 (14) | -3.8 (14)  |
| C8   | 19.9 (18) | 13.7 (18) | 21.4 (17) | 0.8 (13)   | 13.8 (15) | -0.5 (14)  |
| C4   | 28.1 (19) | 14.6 (19) | 24.0 (16) | 2.6 (14)   | 21.0 (15) | -0.2 (15)  |

Table S4. Torsion Angles for **1**.

| <b>A</b> | <b>B</b> | <b>C</b> | <b>D</b> | <b>Angle/°</b> | <b>A</b> | <b>B</b> | <b>C</b> | <b>D</b> | <b>Angle/°</b> |
|----------|----------|----------|----------|----------------|----------|----------|----------|----------|----------------|
| Co1      | O1       | C1       | C2       | 37.9(3)        | C5       | N1       | C2       | C1       | 166.4(3)       |
| Co1      | O2       | C4       | C3       | 57.8(3)        | C7       | C6       | C5       | N1       | 89.9(4)        |
| Co1      | N1       | C5       | C6       | 170.5(2)       | C7       | C6       | C11      | C10      | -2.2(6)        |
| Co1      | N1       | C3       | C4       | 19.5(3)        | C3       | N1       | C5       | C6       | -67.3(4)       |
| Co1      | N1       | C2       | C1       | 46.0(3)        | C3       | N1       | C2       | C1       | -69.5(4)       |
| O3       | C12      | C9       | C10      | -13.9(5)       | C10      | C9       | C8       | C7       | -1.2(5)        |
| O3       | C12      | C9       | C8       | 167.8(3)       | C11      | C6       | C5       | N1       | -90.6(4)       |
| C6       | C7       | C8       | C9       | -1.9(6)        | C11      | C6       | C7       | C8       | 3.5(6)         |
| N1       | C3       | C4       | O2       | -50.4(4)       | C2       | N1       | C5       | C6       | 55.7(4)        |
| N1       | C2       | C1       | O1       | -57.2(4)       | C2       | N1       | C3       | C4       | 131.6(3)       |
| C12      | C9       | C10      | C11      | -175.9(4)      | O4       | C12      | C9       | C10      | 166.2(4)       |
| C12      | C9       | C8       | C7       | 177.3(3)       | O4       | C12      | C9       | C8       | -12.2(5)       |
| C9       | C10      | C11      | C6       | -0.9(6)        | C11      | O1       | C1       | C2       | 170.9(2)       |
| C5       | C6       | C7       | C8       | -177.0(3)      | C8       | C9       | C10      | C11      | 2.5(5)         |
| C5       | C6       | C11      | C10      | 178.3(3)       | C41      | O2       | C4       | C3       | 179.8(3)       |
| C5       | N1       | C3       | C4       | -105.0(3)      |          |          |          |          |                |

Table S5 Hydrogen Atom Coordinates ( $\text{\AA}\times 10^4$ ) and Isotropic Displacement Parameters ( $\text{\AA}^2\times 10^3$ ) for **1**.

| Atom | x         | y        | z          | U(eq)   |
|------|-----------|----------|------------|---------|
| H5A  | 3300      | 1245     | 6672       | 20      |
| H5B  | 3230      | 1305     | 4412       | 20      |
| H7   | 4448      | 2205     | 3997       | 22      |
| H3A  | 7921      | 1042     | 8018       | 23      |
| H3B  | 6253      | 1398     | 5699       | 23      |
| H10  | 5415      | 3006     | 10795      | 22      |
| H11  | 4609      | 2033     | 9777       | 22      |
| H2A  | 6218      | 1046     | 10838      | 20      |
| H2B  | 7557      | 1396     | 10739      | 20      |
| H1A  | 9039      | 520      | 11240      | 22      |
| H1B  | 9063      | 580      | 13477      | 22      |
| H8   | 5373      | 3171     | 5127       | 22      |
| H4A  | 4959      | 556      | 3278       | 23      |
| H4B  | 7025      | 557      | 4514       | 23      |
| H6   | 2040 (70) | 356 (14) | 2180 (80)  | 50 (16) |
| H5   | 2650 (50) | 343 (3)  | 7950 (120) | 75      |



Table S6. Hydrogen Bonds in **1**.

| D-H-A                 | d(D-H)/Å | d(H-A)/Å | d(D-A)/Å | D-H-A/° |
|-----------------------|----------|----------|----------|---------|
| O6-H6-O3 <sup>1</sup> | 0.994(6) | 1.641(7) | 2.635(3) | 179(6)  |
| O5-H5-O42             | 0.993(6) | 1.619(8) | 2.607(4) | 173(4)  |

<sup>1</sup>-1/2+X,1/2-Y,-1+Z; <sup>2</sup>-1/2+X,1/2-Y,+Z

Table S7 Fractional Atomic Coordinates ( $\times 10^4$ ) and Equivalent Isotropic Displacement Parameters ( $\text{Å}^2 \times 10^3$ ) for **2**.  $U_{eq}$  is defined as 1/3 of of the trace of the orthogonalised  $U_{ij}$  tensor.

| Atom | x            | y            | z             | U(eq)      |
|------|--------------|--------------|---------------|------------|
| Mn1  | -2500        | -7500        | -14884.7 (3)  | 14.48 (11) |
| C11  | -2483.8 (9)  | -4627 (4)    | -13772 (3)    | 33.8 (7)   |
| C5   | -3865.5 (6)  | -2917 (2)    | -16906.6 (15) | 18.1 (4)   |
| O3   | -2784.4 (6)  | -5667 (2)    | -14078.3 (14) | 28.9 (4)   |
| C2   | -3222.4 (6)  | -4561 (2)    | -16250.3 (15) | 18.0 (4)   |
| C8   | -4211.6 (6)  | -2040 (2)    | -17265.5 (15) | 20.2 (4)   |
| C3   | -3181.4 (6)  | -3039 (2)    | -16370.5 (16) | 19.2 (4)   |
| C4   | -3501.5 (6)  | -2233 (2)    | -16697.7 (16) | 19.6 (4)   |
| C1   | -2879.4 (7)  | -5433 (2)    | -15890.7 (17) | 21.7 (4)   |
| O1   | -2952.0 (5)  | -6789.8 (19) | -15718.9 (13) | 24.9 (4)   |
| O2   | -2547.8 (7)  | -4826 (3)    | -15759.3 (19) | 31.9 (5)   |
| C7   | -3583.6 (7)  | -5259 (3)    | -16466 (2)    | 24.8 (5)   |
| C6   | -3900.8 (6)  | -4445 (2)    | -16790.5 (18) | 24.4 (5)   |
| N1   | -3045.6 (6)  | -8653 (3)    | -14168.1 (14) | 25.5 (4)   |
| C12  | -2112.1 (9)  | -5450 (4)    | -13500 (2)    | 33.8 (6)   |
| C10  | -3049.8 (9)  | -6181 (4)    | -13466 (2)    | 36.4 (7)   |
| C9   | -3302.7 (9)  | -7411 (3)    | -13853 (2)    | 34.1 (7)   |
| O1W  | -3019.3 (10) | -8987 (3)    | -16929.3 (18) | 46.        |

Table S8 Anisotropic Displacement Parameters ( $\text{Å}^2 \times 10^3$ ) for **2**. The Anisotropic displacement factor exponent takes the form:  $-2\pi^2[h^2a^{*2}U_{11}+...+2hka \times b \times U_{12}]$ 

| Atom | U <sub>11</sub> | U <sub>22</sub> | U <sub>33</sub> | U <sub>23</sub> | U <sub>13</sub> | U <sub>12</sub> |
|------|-----------------|-----------------|-----------------|-----------------|-----------------|-----------------|
| Mn1  | 13.09 (14)      | 16.36 (14)      | 14.0 (2)        | 0               | 0               | -0.96 (13)      |
| C11  | 36.7 (14)       | 29.1 (12)       | 35.5 (19)       | -11.2 (12)      | 5.1 (11)        | -11.8 (10)      |
| C5   | 14.8 (7)        | 21.5 (7)        | 18.1 (11)       | -1.2 (7)        | -2.7 (7)        | 4.2 (6)         |
| O3   | 30.5 (8)        | 31.0 (7)        | 25.1 (10)       | -8.6 (7)        | 6.2 (8)         | -2.7 (7)        |
| C2   | 14.7 (7)        | 21.3 (7)        | 17.9 (10)       | 1.3 (7)         | -3.4 (7)        | 3.0 (6)         |
| C8   | 17.5 (7)        | 25.8 (8)        | 17.2 (11)       | -2.1 (7)        | -3.1 (7)        | 7.7 (7)         |
| C3   | 14.8 (7)        | 19.9 (7)        | 22.7 (12)       | 0.8 (7)         | -0.4 (7)        | 1.1 (6)         |
| C4   | 16.3 (7)        | 20.9 (6)        | 21.6 (11)       | 1.9 (7)         | -1.6 (8)        | 2.7 (6)         |
| C1   | 21.5 (8)        | 23.3 (8)        | 20.1 (12)       | 0.1 (8)         | -4.1 (8)        | 6.0 (7)         |
| O1   | 29.4 (8)        | 22.7 (6)        | 22.5 (10)       | 1.5 (6)         | -6.8 (7)        | 6.3 (6)         |

|     |           |           |           |            |            |            |
|-----|-----------|-----------|-----------|------------|------------|------------|
| O2  | 19.0 (7)  | 37.5 (11) | 39.3 (16) | -2.5 (10)  | -10.8 (8)  | 3.8 (6)    |
| C7  | 19.1 (8)  | 21.1 (7)  | 34.4 (15) | 2.7 (9)    | -6.6 (9)   | 0.9 (7)    |
| C6  | 16.4 (8)  | 22.9 (7)  | 34.1 (14) | -0.4 (8)   | -8.8 (8)   | 0.5 (6)    |
| N1  | 24.0 (8)  | 35.6 (9)  | 16.8 (10) | -1.9 (8)   | 1.8 (8)    | -13.4 (7)  |
| C12 | 35.6 (12) | 43.6 (14) | 22.1 (14) | -6.2 (12)  | 1.5 (11)   | -15.4 (12) |
| C10 | 33.5 (12) | 41.0 (13) | 34.8 (18) | -14.3 (12) | 12.1 (12)  | -12.9 (11) |
| C9  | 25.6 (11) | 40.7 (13) | 36.0 (17) | -13.0 (12) | 11.8 (12)  | -9.0 (9)   |
| O1W | 65.1 (17) | 39.5 (10) | 34.3 (14) | -12.9 (10) | -12.8 (12) | -5.3 (12)  |

Table S9. Hydrogen Bonds for **2**.

| <b>D</b> | <b>H</b> | <b>A</b>        | <b>d(D-H)/Å</b> | <b>d(H-A)/Å</b> | <b>d(D-A)/Å</b> | <b>D-H-A/°</b> |
|----------|----------|-----------------|-----------------|-----------------|-----------------|----------------|
| O1W      | H1WA     | O1              | 0.999 (16)      | 1.87 (2)        | 2.821 (3)       | 158 (4)        |
| O1W      | H1WB     | O2 <sup>1</sup> | 0.990 (18)      | 2.02 (4)        | 2.893 (4)       | 146 (5)        |

<sup>1</sup>-1/2-X,-3/2-Y,+Z

Table S10. Hydrogen Atom Coordinates ( $\text{\AA}\times 10^4$ ) and Isotropic Displacement Parameters ( $\text{\AA}^2\times 10^3$ ) for **2**.

| Atom | x          | y          | z           | U(eq)   |
|------|------------|------------|-------------|---------|
| H11A | -2598      | -4063      | -13310      | 41      |
| H11B | -2411      | -3914      | -14205      | 41      |
| H8B  | -4101      | -1356      | -17680      | 24      |
| H8A  | -4396      | -2735      | -17547      | 24      |
| H12A | -1903      | -4737      | -13321      | 41      |
| H12B | -2180      | -6097      | -13035      | 41      |
| H9A  | -3495      | -7805      | -13445      | 41      |
| H9B  | -3463      | -6992      | -14307      | 41      |
| H1WA | -3059 (16) | -8120 (50) | -16560 (30) | 69      |
| H1WB | -2789 (13) | -9590 (60) | -16730 (30) | 69      |
| H4   | -3455 (12) | -1178 (15) | -16850 (20) | 23 (5)  |
| H3   | -2913 (5)  | -2570 (30) | -16260 (30) | 23 (5)  |
| H6   | -4143 (7)  | -5050 (30) | -16930 (30) | 23 (5)  |
| H7   | -3615 (13) | -6354 (10) | -16410 (30) | 32 (10) |
| H10A | -3241 (11) | -5350 (40) | -13360 (30) | 43 (8)  |
| H10B | -2883 (13) | -6630 (50) | -13020 (20) | 43 (8)  |

Table S11: Total energy ( $E$ , in Hartrees) and relative energy ( $\Delta E$ , in kcal/mol) for different conformers obtained at the M06-2X/6-31G(d) and M06-2X/6-311+G(d,p) levels.

| Sl. No. | Conformer                  | M06-2X/6-31G(d) |                       | M06-2X/6-311+G(d,p) |                       |
|---------|----------------------------|-----------------|-----------------------|---------------------|-----------------------|
|         |                            | $E$ (Hartrees)  | $\Delta E$ (kcal/mol) | $E$ (Hartrees)      | $\Delta E$ (kcal/mol) |
| 1       | <b>LH<sub>2</sub>-Comp</b> | -1492.83425     | 8.06                  | -1493.26942         | 6.75                  |
| 2       | <b>LH<sub>2</sub>-C1</b>   | -1492.84254     | 2.86                  | -1493.27689         | 2.06                  |
| 3       | <b>LH<sub>2</sub>-C2</b>   | -1492.84243     | 2.93                  | -1493.27681         | 2.12                  |
| 4       | <b>LH<sub>2</sub>-C3</b>   | -1492.83239     | 9.23                  | -1493.26804         | 7.62                  |
| 5       | <b>LH<sub>2</sub>-C4</b>   | -1492.84573     | 0.86                  | -1493.28019         | -0.01                 |
| 6       | <b>LH<sub>2</sub>-C5</b>   | -1492.84710     | 0.00                  | -1493.28018         | 0.00                  |
| 7       | <b>LH<sub>2</sub>-C6</b>   | -1492.84159     | 3.46                  | -1493.27623         | 2.48                  |
| 8       | <b>LH<sub>2</sub>-C7</b>   | -1492.84499     | 1.32                  | -1493.27946         | 0.46                  |
| 9       | <b>LH<sub>2</sub>-C8</b>   | -1492.84421     | 1.81                  | -1493.27733         | 1.79                  |
| 10      | <b>LH<sub>2</sub>-C9</b>   | -1492.80618     | 25.68                 | -1493.24192         | 24.01                 |
| 11      | <b>LH<sub>2</sub>-C10</b>  | -1492.82961     | 10.98                 | -1493.26374         | 10.32                 |
| 12      | <b>LH<sub>2</sub>-C11</b>  | -1492.83170     | 9.66                  | -1493.26570         | 9.09                  |
| 13      | <b>LH<sub>2</sub>-C12</b>  | -1492.82988     | 10.81                 | -1493.26456         | 9.80                  |
| 14      | <b>LH<sub>2</sub>-C13</b>  | -1492.83242     | 9.21                  | -1493.26658         | 8.53                  |
| 15      | <b>LH<sub>2</sub>-C14</b>  | -1492.83544     | 7.32                  | -1493.27034         | 6.18                  |
| 16      | <b>LH<sub>2</sub>-C15</b>  | -1492.84326     | 2.41                  | -1493.27736         | 1.77                  |
| 17      | <b>LH<sub>2</sub>-C16</b>  | -1492.83434     | 8.01                  | -1493.26938         | 6.78                  |

Table 12: Fractional Atomic Coordinates ( $\times 10^4$ ) and Equivalent Isotropic Displacement Parameters ( $\text{\AA}^2 \times 10^3$ ) for ligand, **LH<sub>2</sub>** chloride salt.  $U_{eq}$  is defined as 1/3 of the trace of the orthogonalised  $U_{ij}$ .

| Atom | x         | y          | z        | $U_{eq}$ |
|------|-----------|------------|----------|----------|
| O1   | -10783(4) | 829(2)     | 11225(2) | 20.6(10) |
| O3   | -4327(4)  | 1848.7(19) | 8354(2)  | 16.2(10) |
| O4   | -2702(4)  | 950.5(19)  | 9083(2)  | 15.6(9)  |
| O2   | -9172(4)  | 420(2)     | 11743(2) | 21.3(10) |
| O5   | 3458(4)   | 1928(2)    | 6374(2)  | 25.5(11) |
| O6   | 2372(5)   | 2215(2)    | 5543(2)  | 29.7(11) |
| N1   | -5390(5)  | 949(2)     | 9155(2)  | 12.7(11) |
| N2   | -2263(5)  | 1247(2)    | 7797(2)  | 13.3(11) |
| C3   | -9185(6)  | 928(3)     | 10190(3) | 13.9(13) |
| C7   | -5819(6)  | 1605(3)    | 9098(3)  | 15.7(13) |
| C23  | -7051(6)  | 192(3)     | 10204(3) | 16.5(14) |
| C1   | -9719(5)  | 625(3)     | 11245(3) | 15.2(13) |
| C13  | -3291(6)  | 1168(3)    | 9617(3)  | 15.5(13) |
| C8   | -5650(5)  | 1818(3)    | 8454(3)  | 15.5(13) |

| Atom | x           | y          | z         | $U_{eq}$ |
|------|-------------|------------|-----------|----------|
| C24  | -7804(6)    | 221(3)     | 10710(3)  | 15.6(14) |
| C2   | -8879(6)    | 587(3)     | 10707(3)  | 16.1(13) |
| C5   | -7340(6)    | 534(3)     | 9687(3)   | 13.7(13) |
| C12  | -1721(6)    | 1354(3)    | 8886(3)   | 17.6(14) |
| C17  | 411(6)      | 1041(3)    | 7101(3)   | 18.3(14) |
| C14  | -4538(6)    | 837(3)     | 9681(3)   | 16.8(14) |
| C11  | -1280(6)    | 1163(3)    | 8273(3)   | 16.9(14) |
| C20  | 2438(7)     | 1962(3)    | 6029(3)   | 21.6(15) |
| C6   | -6494(6)    | 499(3)     | 9142(3)   | 17.2(14) |
| C18  | 1464(6)     | 1296(3)    | 6820(3)   | 21.1(15) |
| C10  | -2613(6)    | 1907(3)    | 7685(3)   | 19.0(14) |
| C16  | -797(6)     | 1173(3)    | 6894(3)   | 15.8(13) |
| C4   | -8416(6)    | 901(3)     | 9688(3)   | 18.3(14) |
| C19  | 1319(6)     | 1666(2)    | 6318(3)   | 18.6(14) |
| C15  | -1937(6)    | 913(3)     | 7215(3)   | 18.4(14) |
| C9   | -4017(6)    | 1998(3)    | 7749(3)   | 19.1(14) |
| C21  | 126(7)      | 1777(3)    | 6099(3)   | 21.2(15) |
| C22  | -930(6)     | 1533(3)    | 6382(3)   | 20.7(15) |
| O10  | 470(4)      | 3214.9(19) | 6712(2)   | 17.2(10) |
| O9   | 2212(4)     | 4024.7(18) | 5957(2)   | 16.6(10) |
| O7   | -3966(4)    | 4542(2)    | 3208(2)   | 23.6(11) |
| O8   | -5666(4)    | 4204(2)    | 3708(2)   | 23.4(11) |
| O11  | 7641(4)     | 2948(2)    | 9165(2)   | 30.0(12) |
| O12  | 6072(5)     | 2692(2)    | 9794(2)   | 26.2(11) |
| N4   | 2663(5)     | 3773(2)    | 7185(2)   | 13.5(11) |
| N3   | -567(5)     | 4095(2)    | 5914(2)   | 12.8(11) |
| C34  | 3712(6)     | 3801(3)    | 6728(3)   | 16.9(14) |
| C40  | 3907(6)     | 3863(3)    | 8155(3)   | 15.5(13) |
| C26  | -3822(6)    | 4430(3)    | 4264(3)   | 14.0(13) |
| C47  | -3482(6)    | 4150(3)    | 5300(3)   | 15.4(13) |
| C25  | -4589(6)    | 4375(3)    | 3709(3)   | 17.7(14) |
| C35  | 2256(6)     | 3127(3)    | 7331(3)   | 17.1(14) |
| C42  | 6045(6)     | 3608(3)    | 8428(3)   | 20.3(14) |
| C27  | -2755(6)    | 4804(3)    | 4283(3)   | 15.9(14) |
| C41  | 5195(6)     | 3898(3)    | 8043(3)   | 16.4(13) |
| C36  | 847(6)      | 3070(3)    | 7311(3)   | 18.9(14) |
| C39  | 2960(6)     | 4153(3)    | 7742(3)   | 15.5(13) |
| C48  | -4187(6)    | 4113(3)    | 4771(3)   | 15.5(14) |
| C29  | -2415(6)    | 4517(3)    | 5324(3)   | 15.6(14) |
| C33  | 3226(6)     | 3623(3)    | 6109(3)   | 17.1(14) |
| C28  | -2066(6)    | 4852(3)    | 4815(3)   | 17.1(14) |
| C46  | 3486(6)     | 3553(3)    | 8666(3)   | 17.0(14) |
| C43  | 5607(6)     | 3286(3)    | 8921(3)   | 19.5(15) |
| C37  | -862(6)     | 3247(3)    | 6637(3)   | 17.4(14) |
| C45  | 4326(6)     | 3266(3)    | 9045(3)   | 19.5(14) |
| C30  | -1628(6)    | 4562(3)    | 5890(3)   | 16.1(13) |
| C44  | 6460(6)     | 2953(3)    | 9349(3)   | 20.3(14) |
| C31  | 313(6)      | 4161(3)    | 5387(3)   | 16.1(14) |
| C32  | 1510(6)     | 3794(3)    | 5456(3)   | 17.6(14) |
| C38  | -1069(6)    | 3449(3)    | 6001(3)   | 19.5(15) |
| Cl4  | -4088.2(13) | 2662.0(7)  | 6284.2(8) | 18.0(3)  |
| Cl2  | 447.6(14)   | 4749.0(6)  | 7042.7(7) | 16.6(3)  |
| Cl1  | -4510.7(14) | 337.2(6)   | 7958.1(7) | 15.9(3)  |
| Cl3  | 1273.8(14)  | 2119.2(7)  | 8523.4(8) | 20.5(3)  |
| O1W  | 1338(5)     | 2883(2)    | 9672(3)   | 32.2(12) |
| O2W  | -4041(5)    | 2385(2)    | 4916(3)   | 31.5(12) |

Table S13: Anisotropic Displacement Parameters ( $\times 10^4$ ) for ligand, **LH<sub>2</sub>** chloride salt. The anisotropic displacement factor exponent takes the form:  $-2\pi^2[h^2a^{*2} \times U_{11} + \dots + 2hka^* \times b^* \times U_{12}]$

| Atom | $U_{11}$ | $U_{22}$ | $U_{33}$ | $U_{23}$ | $U_{13}$ | $U_{12}$ |
|------|----------|----------|----------|----------|----------|----------|
| O1   | 14(2)    | 27(2)    | 21(3)    | -1(2)    | 4(2)     | 2.4(17)  |
| O3   | 12(2)    | 21(2)    | 16(2)    | 2.9(19)  | 4.5(18)  | 1.5(16)  |
| O4   | 14(2)    | 20(2)    | 12(2)    | -0.9(19) | 1.1(18)  | -4.3(17) |
| O2   | 17(2)    | 29(2)    | 17(3)    | 3(2)     | 3(2)     | 5.7(19)  |
| O5   | 20(3)    | 26(2)    | 31(3)    | 1(2)     | 11(2)    | -5.4(18) |
| O6   | 34(3)    | 32(3)    | 23(3)    | 3(2)     | 11(2)    | -3(2)    |
| N1   | 14(3)    | 13(2)    | 11(3)    | 1(2)     | 5(2)     | 0.1(19)  |
| N2   | 10(3)    | 16(2)    | 15(3)    | 1(2)     | 2(2)     | -1.3(19) |
| C3   | 15(3)    | 13(3)    | 14(3)    | -1(3)    | 0(3)     | -2(2)    |
| C7   | 15(3)    | 15(3)    | 17(3)    | 2(3)     | 6(3)     | 1(2)     |
| C23  | 15(3)    | 15(3)    | 20(4)    | 0(3)     | -3(3)    | -1(2)    |
| C1   | 13(3)    | 14(3)    | 19(3)    | 3(3)     | 0(3)     | -2(2)    |
| C13  | 14(3)    | 17(3)    | 15(3)    | -4(3)    | 4(3)     | 2(2)     |
| C8   | 15(3)    | 17(3)    | 15(3)    | 4(3)     | 4(3)     | 0(2)     |
| C24  | 14(3)    | 19(3)    | 14(4)    | 0(3)     | -1(3)    | -1(2)    |
| C2   | 14(3)    | 17(3)    | 18(4)    | -4(3)    | 0(3)     | -4(2)    |
| C5   | 15(3)    | 15(3)    | 11(3)    | -1(3)    | -1(3)    | -3(2)    |
| C12  | 17(3)    | 21(3)    | 14(3)    | -2(3)    | 3(3)     | -5(2)    |
| C17  | 21(3)    | 14(3)    | 20(4)    | 2(3)     | 6(3)     | 4(2)     |
| C14  | 19(3)    | 17(3)    | 15(3)    | 1(3)     | -1(3)    | 2(2)     |
| C11  | 13(3)    | 24(3)    | 14(3)    | 3(3)     | 2(3)     | -1(3)    |
| C20  | 27(4)    | 13(3)    | 24(4)    | -7(3)    | 7(3)     | -1(3)    |
| C6   | 14(3)    | 20(3)    | 17(4)    | -4(3)    | 0(3)     | -2(2)    |
| C18  | 19(3)    | 20(3)    | 24(4)    | -1(3)    | 5(3)     | 2(2)     |
| C10  | 20(3)    | 16(3)    | 21(4)    | 5(3)     | 8(3)     | -1(2)    |
| C16  | 19(3)    | 12(3)    | 16(4)    | -2(3)    | 3(3)     | 1(2)     |
| C4   | 19(4)    | 22(3)    | 14(4)    | 3(3)     | -1(3)    | -2(3)    |
| C19  | 27(3)    | 10(3)    | 19(4)    | -2(3)    | 11(3)    | 1(2)     |
| C15  | 18(3)    | 20(3)    | 17(4)    | -7(3)    | 2(3)     | -1(2)    |
| C9   | 22(4)    | 19(3)    | 16(4)    | 5(3)     | 4(3)     | 5(2)     |
| C21  | 34(4)    | 13(3)    | 16(4)    | 2(3)     | 6(3)     | 3(3)     |
| C22  | 24(4)    | 16(3)    | 22(4)    | -5(3)    | -3(3)    | 2(2)     |
| O10  | 19(2)    | 18(2)    | 15(2)    | 2.9(19)  | -4.4(19) | -1.9(17) |
| O9   | 20(2)    | 17(2)    | 12(2)    | -2.9(19) | -6(2)    | -0.3(17) |
| O7   | 24(3)    | 33(3)    | 14(3)    | 7(2)     | -2(2)    | -8(2)    |
| O8   | 16(2)    | 35(3)    | 18(3)    | 2(2)     | -3(2)    | -9(2)    |
| O11  | 22(3)    | 33(3)    | 36(3)    | 0(2)     | -13(2)   | 3(2)     |
| O12  | 35(3)    | 23(2)    | 20(3)    | 2(2)     | -6(2)    | 3(2)     |
| N4   | 14(3)    | 14(2)    | 12(3)    | 0(2)     | -2(2)    | 1.3(19)  |
| N3   | 13(3)    | 13(2)    | 13(3)    | 3(2)     | -2(2)    | -2.1(19) |
| C34  | 12(3)    | 20(3)    | 19(4)    | 4(3)     | 0(3)     | 1(2)     |
| C40  | 19(3)    | 14(3)    | 13(3)    | -2(3)    | -4(3)    | -1(2)    |
| C26  | 13(3)    | 11(3)    | 17(3)    | 2(3)     | 0(3)     | 1(2)     |
| C47  | 11(3)    | 22(3)    | 13(4)    | 0(3)     | 2(3)     | 2(2)     |
| C25  | 19(3)    | 13(3)    | 20(4)    | -2(3)    | -2(3)    | 1(2)     |
| C35  | 20(3)    | 14(3)    | 17(4)    | 1(3)     | -4(3)    | -2(2)    |
| C42  | 12(3)    | 25(3)    | 25(4)    | -1(3)    | -6(3)    | -1(2)    |
| C27  | 15(3)    | 12(3)    | 21(4)    | 3(3)     | -1(3)    | 2(2)     |
| C41  | 21(3)    | 15(3)    | 13(3)    | 3(3)     | -3(3)    | -2(2)    |
| C36  | 22(3)    | 18(3)    | 16(4)    | 5(3)     | -1(3)    | -6(3)    |
| C39  | 15(3)    | 17(3)    | 14(3)    | -5(3)    | -2(3)    | 7(2)     |
| C48  | 6(3)     | 17(3)    | 23(4)    | 1(3)     | 2(3)     | 1(2)     |
| C29  | 11(3)    | 16(3)    | 20(4)    | -2(3)    | 0(3)     | 2(2)     |
| C33  | 13(3)    | 23(3)    | 16(4)    | -1(3)    | 0(3)     | 5(2)     |
| C28  | 12(3)    | 19(3)    | 20(4)    | 2(3)     | -5(3)    | -3(2)    |
| C46  | 17(3)    | 18(3)    | 16(4)    | -4(3)    | 2(3)     | 0(2)     |
| C43  | 29(4)    | 12(3)    | 18(4)    | -4(3)    | -7(3)    | 1(3)     |

| Atom | $U_{11}$ | $U_{22}$ | $U_{33}$ | $U_{23}$ | $U_{13}$ | $U_{12}$ |
|------|----------|----------|----------|----------|----------|----------|
| C37  | 13(3)    | 17(3)    | 22(4)    | 2(3)     | -6(3)    | -3(2)    |
| C45  | 31(4)    | 15(3)    | 13(3)    | -4(3)    | 0(3)     | 3(3)     |
| C30  | 16(3)    | 17(3)    | 15(3)    | 0(3)     | -4(3)    | 0(2)     |
| C44  | 22(4)    | 13(3)    | 26(4)    | -6(3)    | -5(3)    | 0(2)     |
| C31  | 15(3)    | 20(3)    | 14(4)    | 1(3)     | -3(3)    | 0(2)     |
| C32  | 16(3)    | 19(3)    | 17(4)    | -4(3)    | -3(3)    | 1(2)     |
| C38  | 21(3)    | 12(3)    | 25(4)    | 0(3)     | -5(3)    | -3(2)    |
| Cl4  | 12.2(7)  | 22.3(7)  | 19.5(8)  | 3.9(7)   | 1.8(6)   | -0.5(5)  |
| Cl2  | 18.6(8)  | 18.5(7)  | 12.6(8)  | -3.0(6)  | -2.9(6)  | 4.7(5)   |
| Cl1  | 18.1(7)  | 18.0(7)  | 11.6(8)  | -2.2(6)  | 1.0(6)   | -3.8(5)  |
| Cl3  | 13.7(7)  | 26.8(7)  | 20.9(8)  | 11.0(7)  | -6.5(7)  | -6.8(6)  |
| O1W  | 35(3)    | 32(3)    | 30(3)    | 6(2)     | -5(3)    | 2(2)     |
| O2W  | 23(3)    | 40(3)    | 32(3)    | -2(3)    | 8(2)     | -4(2)    |

Table S14: Bond Lengths in Å for ligand, LH<sub>2</sub> chloride salt

| Atom | Atom | Length/Å  | Atom | Atom | Length/Å  |
|------|------|-----------|------|------|-----------|
| O1   | C1   | 1.216(7)  | O10  | C37  | 1.424(7)  |
| O3   | C8   | 1.423(7)  | O9   | C33  | 1.429(7)  |
| O3   | C9   | 1.419(8)  | O9   | C32  | 1.430(8)  |
| O4   | C13  | 1.422(7)  | O7   | C25  | 1.343(8)  |
| O4   | C12  | 1.433(7)  | O8   | C25  | 1.203(7)  |
| O2   | C1   | 1.324(8)  | O11  | C44  | 1.318(8)  |
| O5   | C20  | 1.327(9)  | O12  | C44  | 1.212(8)  |
| O6   | C20  | 1.214(9)  | N4   | C34  | 1.508(8)  |
| N1   | C7   | 1.510(7)  | N4   | C35  | 1.511(7)  |
| N1   | C14  | 1.496(8)  | N4   | C39  | 1.522(8)  |
| N1   | C6   | 1.529(8)  | N3   | C30  | 1.521(8)  |
| N2   | C11  | 1.496(8)  | N3   | C31  | 1.502(8)  |
| N2   | C10  | 1.509(7)  | N3   | C38  | 1.523(7)  |
| N2   | C15  | 1.523(8)  | C34  | C33  | 1.515(9)  |
| C3   | C2   | 1.406(9)  | C40  | C41  | 1.391(9)  |
| C3   | C4   | 1.382(9)  | C40  | C39  | 1.500(9)  |
| C7   | C8   | 1.512(9)  | C40  | C46  | 1.394(9)  |
| C23  | C24  | 1.378(9)  | C26  | C25  | 1.481(9)  |
| C23  | C5   | 1.401(9)  | C26  | C27  | 1.397(8)  |
| C1   | C2   | 1.492(9)  | C26  | C48  | 1.376(9)  |
| C13  | C14  | 1.515(9)  | C47  | C48  | 1.394(9)  |
| C24  | C2   | 1.392(8)  | C47  | C29  | 1.388(9)  |
| C5   | C6   | 1.508(9)  | C35  | C36  | 1.501(9)  |
| C5   | C4   | 1.396(9)  | C42  | C41  | 1.395(9)  |
| C12  | C11  | 1.499(9)  | C42  | C43  | 1.381(10) |
| C17  | C18  | 1.397(9)  | C27  | C28  | 1.392(9)  |
| C17  | C16  | 1.391(9)  | C29  | C28  | 1.395(9)  |
| C20  | C19  | 1.496(9)  | C29  | C30  | 1.512(9)  |
| C18  | C19  | 1.385(9)  | C46  | C45  | 1.376(9)  |
| C10  | C9   | 1.510(9)  | C43  | C45  | 1.387(9)  |
| C16  | C15  | 1.515(9)  | C43  | C44  | 1.500(9)  |
| C16  | C22  | 1.390(9)  | C37  | C38  | 1.494(9)  |
| C19  | C21  | 1.377(10) | C31  | C32  | 1.510(8)  |
| C21  | C22  | 1.390(9)  |      |      |           |
| O10  | C36  | 1.424(8)  |      |      |           |



Table S15: Bond Angles in ° for ligand, **LH<sub>2</sub>** chloride salt.

| Atom | Atom | Atom | Angle/°  | Atom | Atom | Atom | Angle/°  |
|------|------|------|----------|------|------|------|----------|
| C9   | O3   | C8   | 112.8(5) | C27  | C26  | C25  | 121.2(6) |
| C13  | O4   | C12  | 111.5(5) | C48  | C26  | C25  | 119.0(5) |
| C7   | N1   | C6   | 112.2(5) | C48  | C26  | C27  | 119.9(6) |
| C14  | N1   | C7   | 113.8(5) | C29  | C47  | C48  | 120.2(6) |
| C14  | N1   | C6   | 111.9(5) | O7   | C25  | C26  | 113.4(5) |
| C11  | N2   | C10  | 114.0(5) | O8   | C25  | O7   | 123.4(6) |
| C11  | N2   | C15  | 112.4(5) | O8   | C25  | C26  | 123.2(6) |
| C10  | N2   | C15  | 112.0(5) | C36  | C35  | N4   | 110.8(5) |
| C4   | C3   | C2   | 120.0(6) | C43  | C42  | C41  | 119.9(6) |
| N1   | C7   | C8   | 109.6(5) | C28  | C27  | C26  | 119.7(6) |
| C24  | C23  | C5   | 121.0(6) | C40  | C41  | C42  | 120.1(6) |
| O1   | C1   | O2   | 124.2(6) | O10  | C36  | C35  | 106.8(5) |
| O1   | C1   | C2   | 123.0(6) | C40  | C39  | N4   | 113.8(5) |
| O2   | C1   | C2   | 112.7(5) | C26  | C48  | C47  | 120.5(6) |
| O4   | C13  | C14  | 107.5(5) | C47  | C29  | C28  | 119.3(6) |
| O3   | C8   | C7   | 106.3(5) | C47  | C29  | C30  | 121.3(6) |
| C23  | C24  | C2   | 119.9(6) | C28  | C29  | C30  | 119.4(5) |
| C3   | C2   | C1   | 119.1(5) | O9   | C33  | C34  | 108.2(5) |
| C24  | C2   | C3   | 119.8(6) | C27  | C28  | C29  | 120.4(6) |
| C24  | C2   | C1   | 121.2(6) | C45  | C46  | C40  | 120.7(6) |
| C23  | C5   | C6   | 119.9(5) | C42  | C43  | C45  | 120.2(6) |
| C4   | C5   | C23  | 119.0(6) | C42  | C43  | C44  | 123.0(6) |
| C4   | C5   | C6   | 121.1(6) | C45  | C43  | C44  | 116.8(6) |
| O4   | C12  | C11  | 109.3(5) | O10  | C37  | C38  | 105.7(5) |
| C16  | C17  | C18  | 120.4(6) | C46  | C45  | C43  | 119.9(6) |
| N1   | C14  | C13  | 112.2(5) | C29  | C30  | N3   | 113.2(5) |
| N2   | C11  | C12  | 112.9(5) | O11  | C44  | C43  | 112.4(6) |
| O5   | C20  | C19  | 112.2(6) | O12  | C44  | O11  | 124.9(6) |
| O6   | C20  | O5   | 125.7(6) | O12  | C44  | C43  | 122.6(6) |
| O6   | C20  | C19  | 122.1(7) | N3   | C31  | C32  | 113.2(5) |
| C5   | C6   | N1   | 114.2(5) | O9   | C32  | C31  | 109.2(5) |
| C19  | C18  | C17  | 120.2(6) | C37  | C38  | N3   | 110.0(5) |
| N2   | C10  | C9   | 110.7(5) |      |      |      |          |
| C17  | C16  | C15  | 120.2(6) |      |      |      |          |
| C22  | C16  | C17  | 118.8(6) |      |      |      |          |
| C22  | C16  | C15  | 121.0(6) |      |      |      |          |
| C3   | C4   | C5   | 120.5(6) |      |      |      |          |
| C18  | C19  | C20  | 120.5(6) |      |      |      |          |
| C21  | C19  | C20  | 120.2(6) |      |      |      |          |
| C21  | C19  | C18  | 119.2(6) |      |      |      |          |
| C16  | C15  | N2   | 113.5(5) |      |      |      |          |
| O3   | C9   | C10  | 106.7(5) |      |      |      |          |
| C19  | C21  | C22  | 121.0(6) |      |      |      |          |
| C16  | C22  | C21  | 120.3(6) |      |      |      |          |
| C36  | O10  | C37  | 113.5(5) |      |      |      |          |
| C33  | O9   | C32  | 111.0(4) |      |      |      |          |
| C34  | N4   | C35  | 113.1(5) |      |      |      |          |
| C34  | N4   | C39  | 111.8(5) |      |      |      |          |
| C35  | N4   | C39  | 113.3(5) |      |      |      |          |
| C30  | N3   | C38  | 111.6(5) |      |      |      |          |
| C31  | N3   | C30  | 111.7(5) |      |      |      |          |
| C31  | N3   | C38  | 113.9(5) |      |      |      |          |
| N4   | C34  | C33  | 110.4(5) |      |      |      |          |
| C41  | C40  | C39  | 121.7(6) |      |      |      |          |
| C41  | C40  | C46  | 119.1(6) |      |      |      |          |
| C46  | C40  | C39  | 119.1(6) |      |      |      |          |

Table S16: Hydrogen Fractional Atomic Coordinates ( $\times 10^4$ ) and Equivalent Isotropic Displacement Parameters ( $\text{\AA}^2 \times 10^3$ ) for ligand, **LH<sub>2</sub>** chloride salt.  $U_{eq}$  is defined as 1/3 of the trace of the orthogonalised  $U_{ij}$ .

| Atom | x     | y    | z     | $U_{eq}$ |
|------|-------|------|-------|----------|
| H2   | -9704 | 408  | 12023 | 32       |
| H5   | 4050  | 2123 | 6210  | 38       |
| H1   | -4879 | 861  | 8786  | 15       |
| H2A  | -3042 | 1046 | 7955  | 16       |
| H3   | -9920 | 1176 | 10186 | 17       |
| H7A  | -5320 | 1867 | 9372  | 19       |
| H7B  | -6718 | 1638 | 9214  | 19       |
| H23  | -6326 | -63  | 10206 | 20       |
| H13A | -3432 | 1615 | 9589  | 19       |
| H13B | -2750 | 1086 | 9971  | 19       |
| H8A  | -6045 | 1525 | 8171  | 19       |
| H8B  | -6040 | 2225 | 8396  | 19       |
| H24  | -7590 | -8   | 11059 | 19       |
| H12A | -1009 | 1340 | 9175  | 21       |
| H12B | -2041 | 1780 | 8871  | 21       |
| H17  | 519   | 776  | 7437  | 22       |
| H14A | -4378 | 392  | 9718  | 20       |
| H14B | -4961 | 975  | 10054 | 20       |
| H11A | -524  | 1404 | 8164  | 20       |
| H11B | -1032 | 726  | 8286  | 20       |
| H6A  | -7005 | 579  | 8777  | 21       |
| H6B  | -6156 | 78   | 9110  | 21       |
| H18  | 2284  | 1216 | 6973  | 25       |
| H10A | -2346 | 2027 | 7274  | 23       |
| H10B | -2165 | 2172 | 7976  | 23       |
| H4   | -8621 | 1135 | 9340  | 22       |
| H15A | -1777 | 477  | 7309  | 22       |
| H15B | -2671 | 932  | 6940  | 22       |
| H9A  | -4245 | 2428 | 7661  | 23       |
| H9B  | -4477 | 1729 | 7466  | 23       |
| H21  | 22    | 2024 | 5750  | 25       |
| H22  | -1746 | 1612 | 6224  | 25       |
| H7   | -4464 | 4541 | 2913  | 35       |
| H11  | 8106  | 2818 | 9443  | 45       |
| H4A  | 1919  | 3973 | 6991  | 16       |
| H3A  | -62   | 4193 | 6282  | 15       |
| H34A | 4398  | 3519 | 6848  | 20       |
| H34B | 4060  | 4221 | 6713  | 20       |
| H47  | -3732 | 3924 | 5645  | 19       |
| H35A | 2635  | 2840 | 7036  | 21       |
| H35B | 2563  | 3014 | 7737  | 21       |
| H42  | 6925  | 3633 | 8352  | 24       |
| H27  | -2501 | 5025 | 3935  | 19       |
| H41  | 5495  | 4120 | 7704  | 20       |
| H36A | 587   | 2648 | 7416  | 23       |
| H36B | 454   | 3356 | 7602  | 23       |
| H39A | 3283  | 4557 | 7612  | 19       |
| H39B | 2170  | 4223 | 7969  | 19       |
| H48  | -4925 | 3867 | 4760  | 19       |
| H33A | 3909  | 3659 | 5808  | 20       |

| Atom | x         | y        | z        | $U_{eq}$ |
|------|-----------|----------|----------|----------|
| H33B | 2927      | 3194     | 6114     | 20       |
| H28  | -1353     | 5115     | 4832     | 21       |
| H46  | 2610      | 3540     | 8753     | 20       |
| H37A | -1233     | 3545     | 6923     | 21       |
| H37B | -1252     | 2842     | 6708     | 21       |
| H45  | 4029      | 3055     | 9391     | 23       |
| H30A | -2181     | 4504     | 6245     | 19       |
| H30B | -1262     | 4978     | 5916     | 19       |
| H31A | 534       | 4599     | 5339     | 19       |
| H31B | -127      | 4028     | 5016     | 19       |
| H32A | 1302      | 3358     | 5523     | 21       |
| H32B | 2021      | 3826     | 5084     | 21       |
| H38A | -1981     | 3438     | 5907     | 23       |
| H38B | -631      | 3166     | 5723     | 23       |
| H1WA | 1700(70)  | 2600(30) | 9980(20) | 48       |
| H1WB | 1340(80)  | 2630(30) | 9290(20) | 48       |
| H2WA | -4840(40) | 2580(30) | 4770(30) | 50(30)   |
| H2WB | -3960(80) | 2450(50) | 5361(15) | 90(40)   |

Table S17: Hydrogen Bond information for ligand, **LH<sub>2</sub>** chloride salt.

| D   | H    | A               | d(D-H)/Å | d(H-A)/Å | d(D-A)/Å | D-H-A/deg |
|-----|------|-----------------|----------|----------|----------|-----------|
| O1W | H1WA | O6 <sup>1</sup> | 1.01(3)  | 1.79(3)  | 2.781(7) | 167(7)    |

•
